# Supplementary material for: A stable 3D porous coordination polymer as multi-chemosensor to Cr(iv) anion and Fe(iii) cation and its selective adsorption of malachite green oxalate dye
Source: Royal Society of Chemistry journal article supplement (doi:10.1039/c5ra20015f), 2015-01-01
Supplement: c5ra20015f1.pdf [file c5ra20015f1.pdf]

## Supporting Information

### **A Stable 3D Porous Coordination Polymer as Multi-Chemosensor to Cr(IV) anion and Fe(III) cation and Its Selective Adsorption of Malachite Green Oxalate Dye**

**Wen-Huan Huang,<sup>a\*</sup> Jia-Zhi Li<sup>a</sup>, Tong Liu<sup>a</sup>, Lu-Sha Gao<sup>a</sup>, Min Jiang<sup>a</sup>, Ya-Nan Zhang<sup>a</sup>, Yao-Yu Wang<sup>b</sup>**

*a* College of Chemistry & Chemical Engineering, Shaanxi University of Science & Technology, Xi'an, Shaanxi 710021, China, Tel: +86-29-86168830; Fax: +86-29-86168830; E-mail: [huangwenhuan@sust.edu.cn](mailto:huangwenhuan@sust.edu.cn)

*b* Key Laboratory of Synthetic and Natural Functional Molecule Chemistry of the Ministry of Education, College of Chemistry & Materials Science, Northwest University, Xi'an 710069, China.

#### **TABLE OF CONTENTS**

|                                               |           |
|-----------------------------------------------|-----------|
| <b>(1) THE SUPPORTING FIGURES</b> .....       | <b>1</b>  |
| <b>(2) IR RESULTS</b> .....                   | <b>3</b>  |
| <b>(3) PXRD and TGA RESULTS</b> .....         | <b>4</b>  |
| <b>(4) LUMINESCENCE SENSING FIGURES</b> ..... | <b>5</b>  |
| <b>(5) MOLECULAR FORMULA OF DYES</b> .....    | <b>9</b>  |
| <b>(6) CRYSTALLOGRAPHIC DATAS</b>             |           |
| <b>TABLES</b> .....                           | <b>12</b> |



## (1) THE SUPPORTING FIGURES

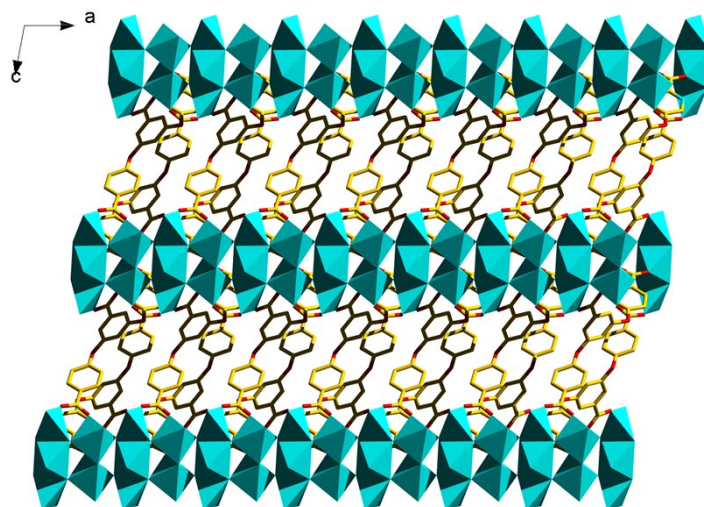

Figure S1. The 3D structure of **1** along the *b* axis.

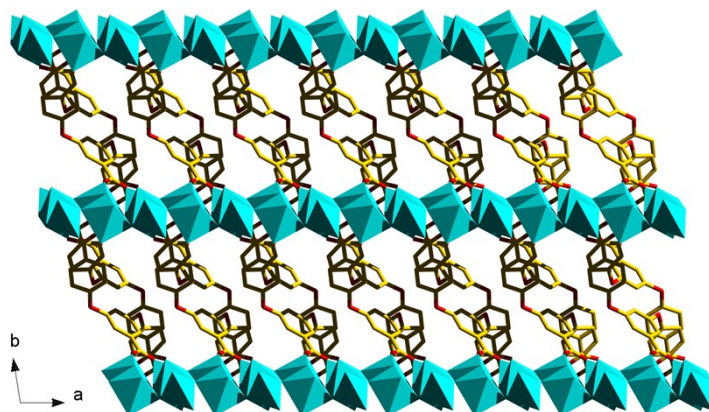

Figure S2. The 3D structure of **1** along the *c* axis.

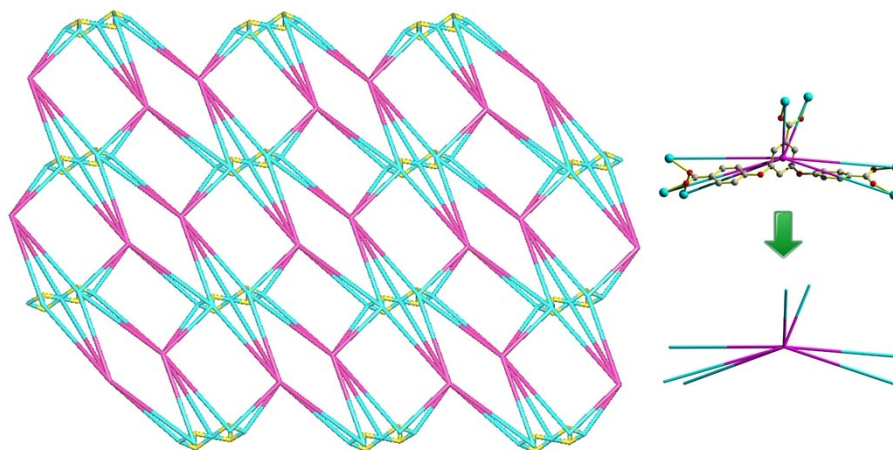

Figure S3. The topology of **1** view along *a* axis.

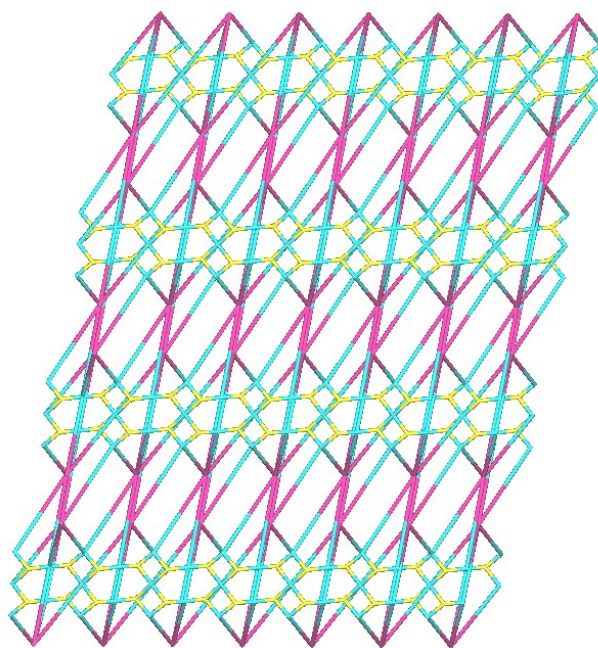

Figure S4. The topology of **1** along the *b* axis.

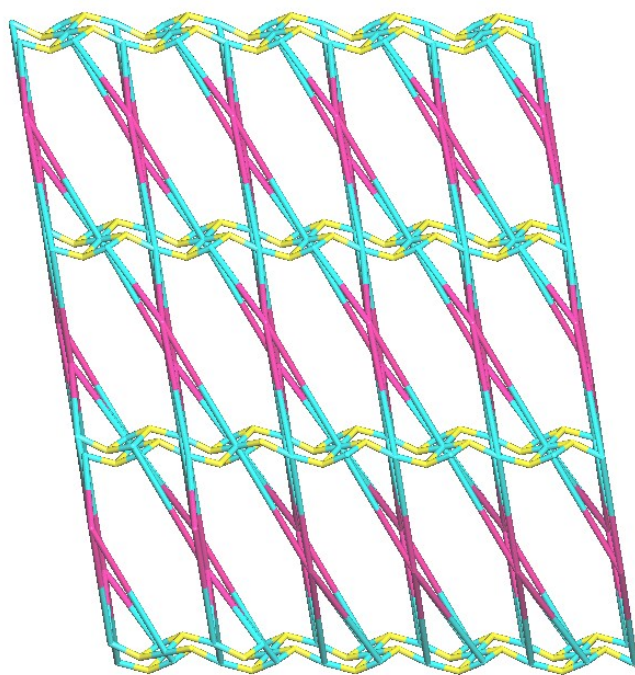

Figure S5. The topology of **1** along the *c* axis.

## (2) IR RESULTS

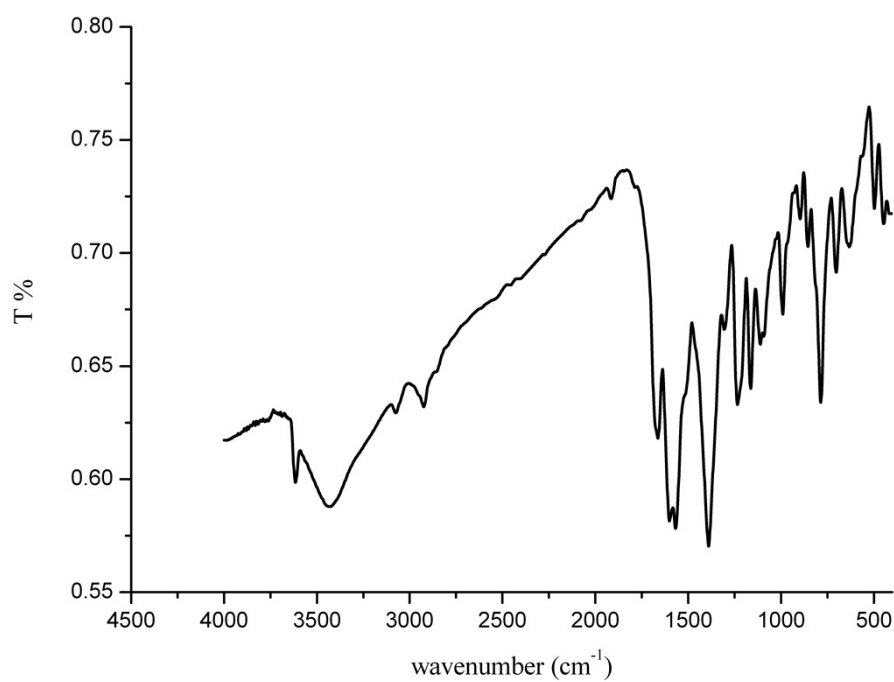

Figure S6. FT-IR spectroscopy of the complex **1-DMF**.

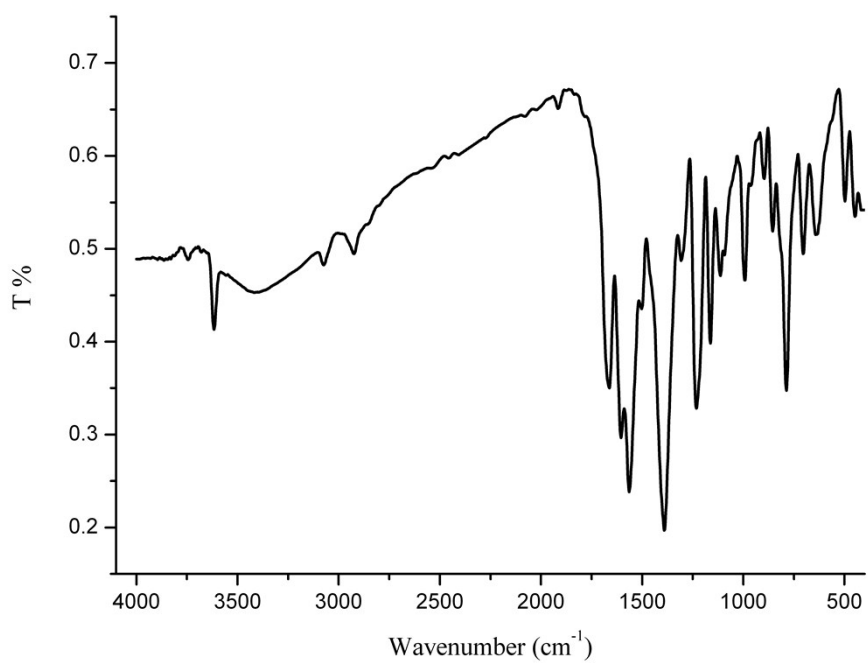

Figure S7. FT-IR spectroscopy of the complex **1-DMA**.

### (3) PXRD RESULTS

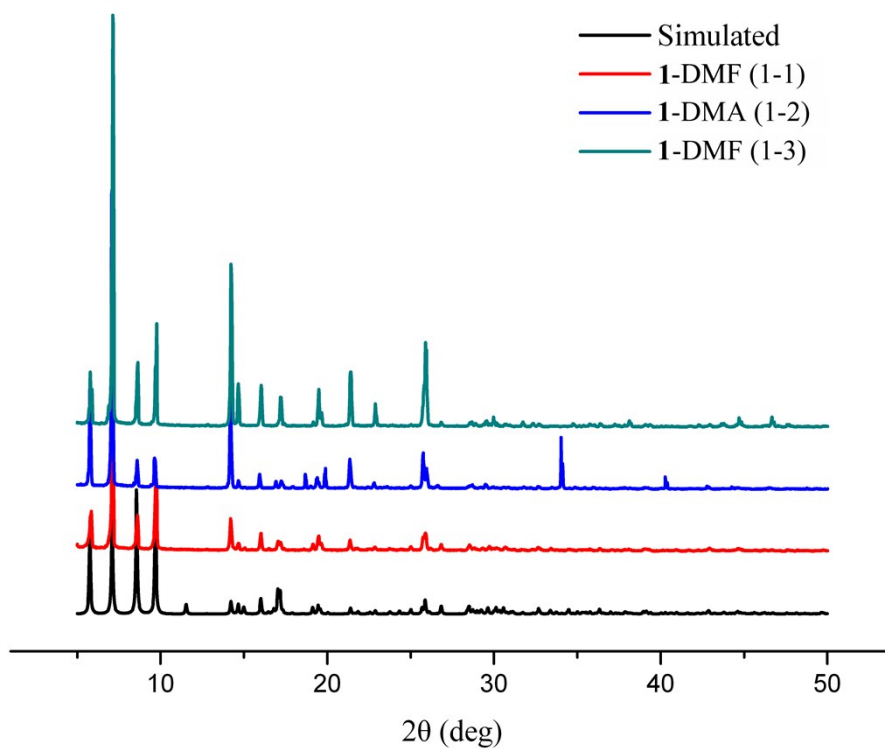

Figure S8. Powder X-ray diffraction patterns of complex **1-DMF** and **1-DMA**.

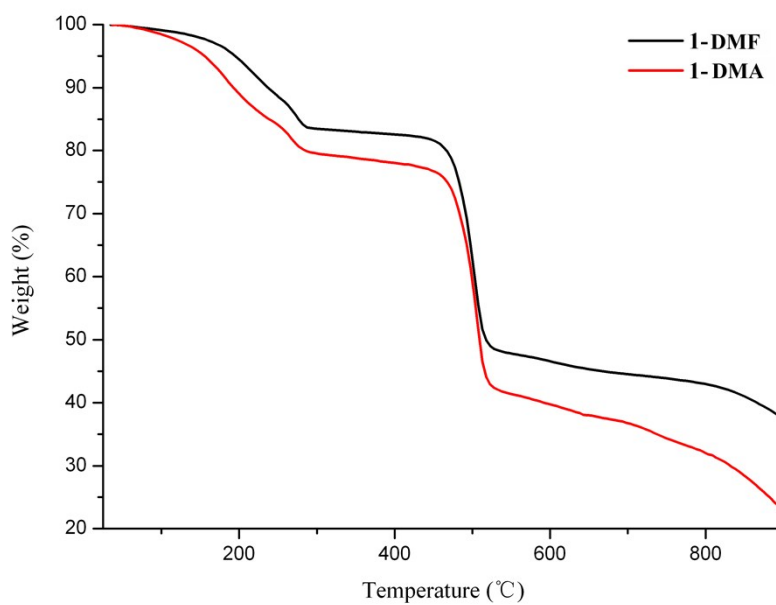

Figure S9. TGA curves of **1-DMF** and **1-DMA**.

#### (4) LUMINESCENCE SENSING FIGURES

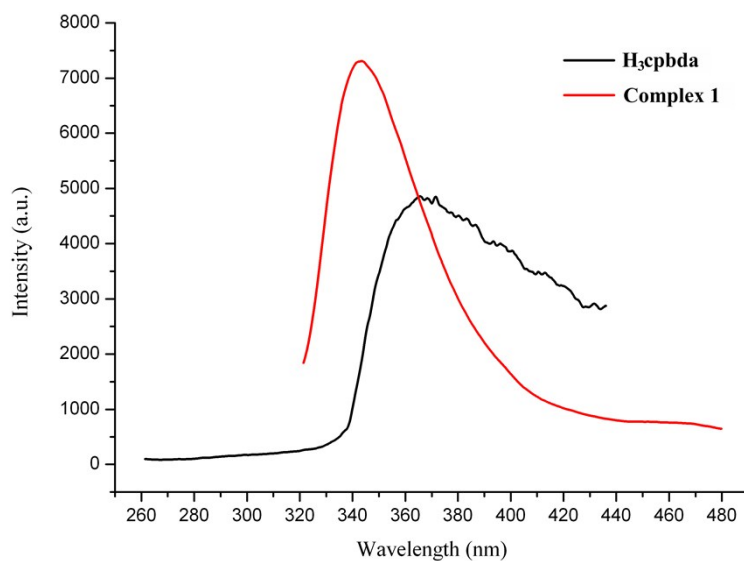

Figure S10. The solid-state fluorescent emission of **1**.

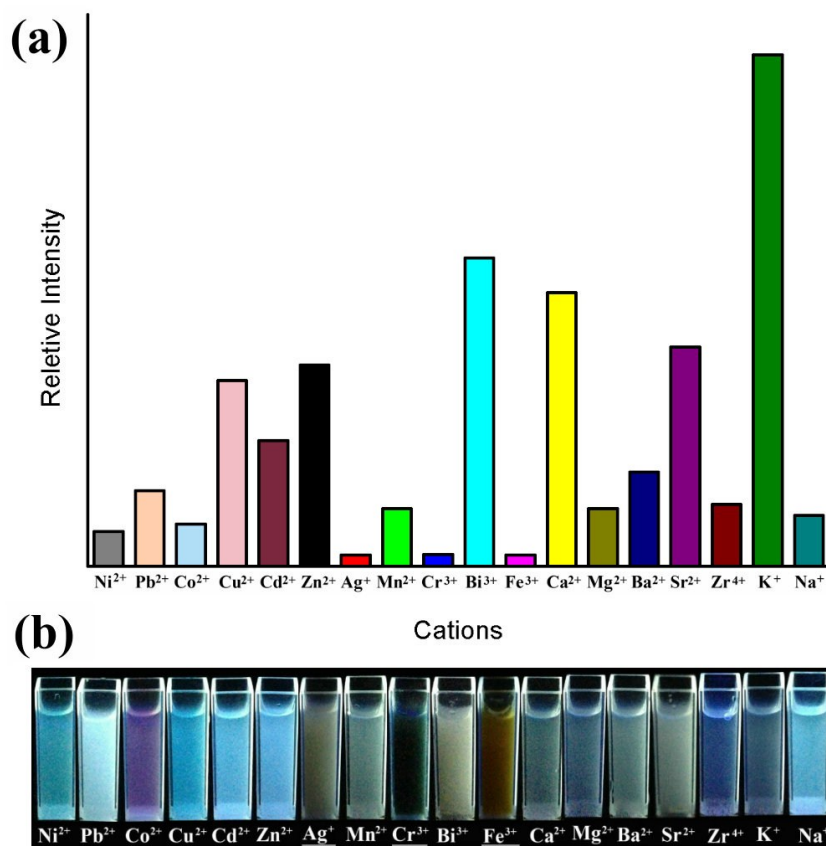

Figure S11. (a) Comparison of the relative luminescence intensities of various metal cations based on **1-DMA**. (b) The visual change on the addition of various metal cations.

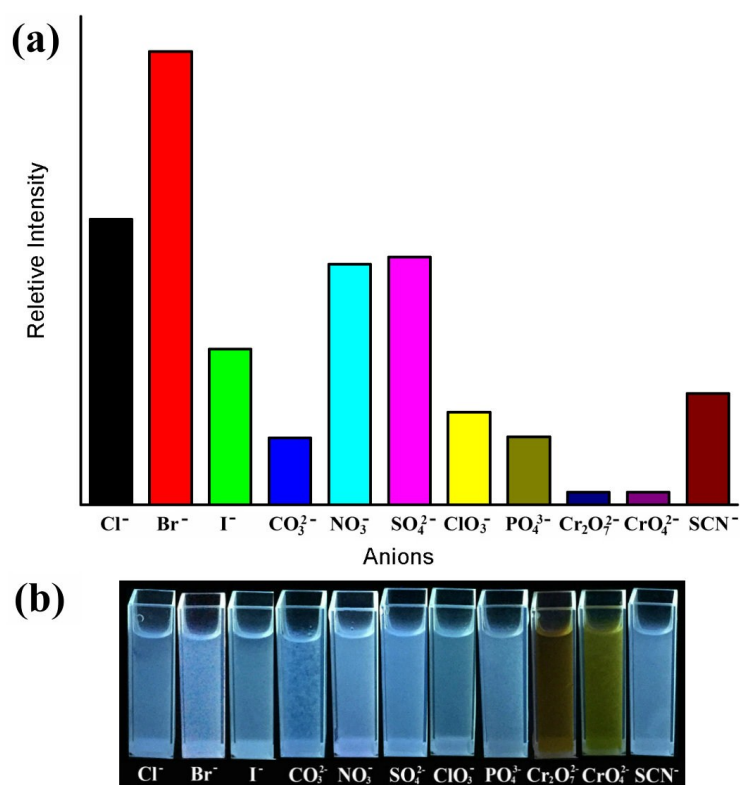

Figure S12. (a) Comparison of the relative luminescence intensities of various anions base on **1-DMA**. (b) The visual change on the addition of various anions.

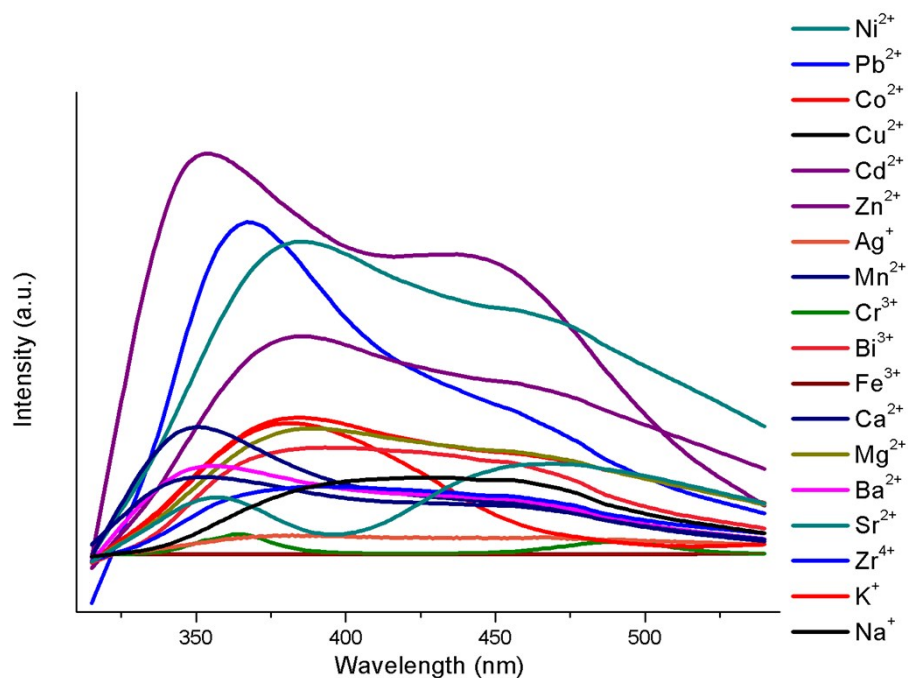

Figure S13. The luminescence emission spectras of complex **1-DMF** suspensions with different metal cations.

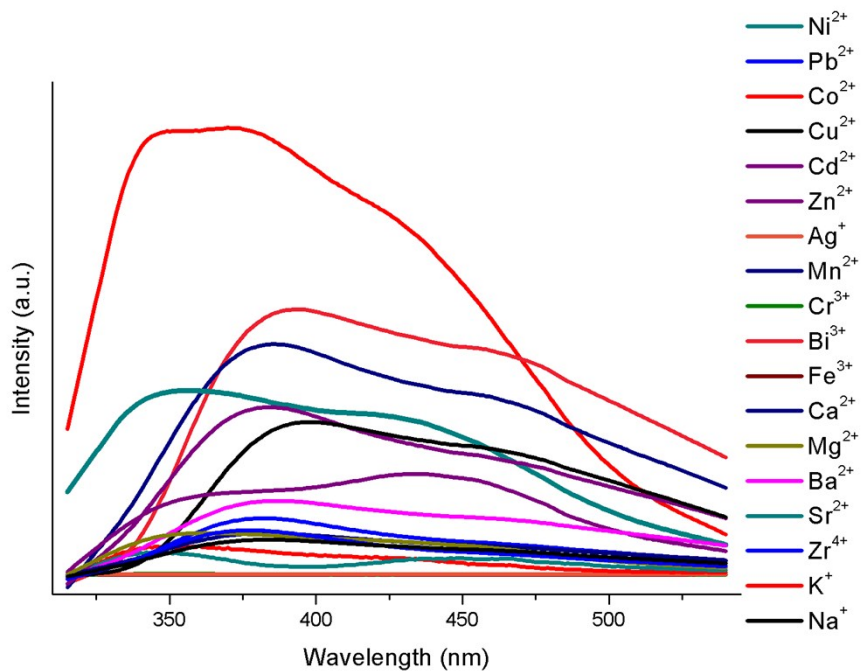

Figure S14. The luminescence emission spectras of complex **1-DMA** suspensions with different metal cations.

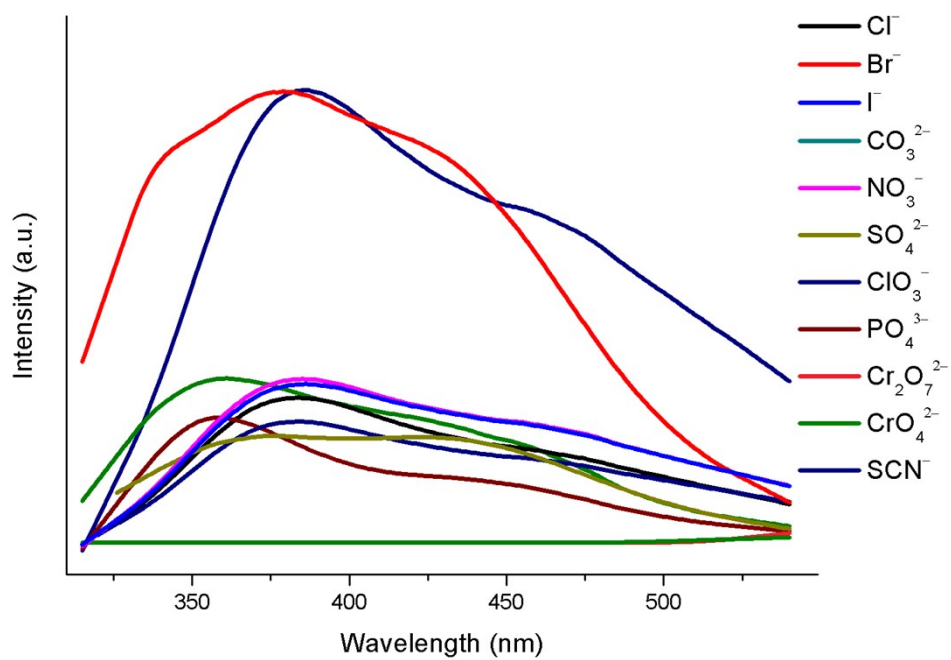

Figure S15. The luminescence emission spectras of complex **1-DMF** suspensions with different anions.

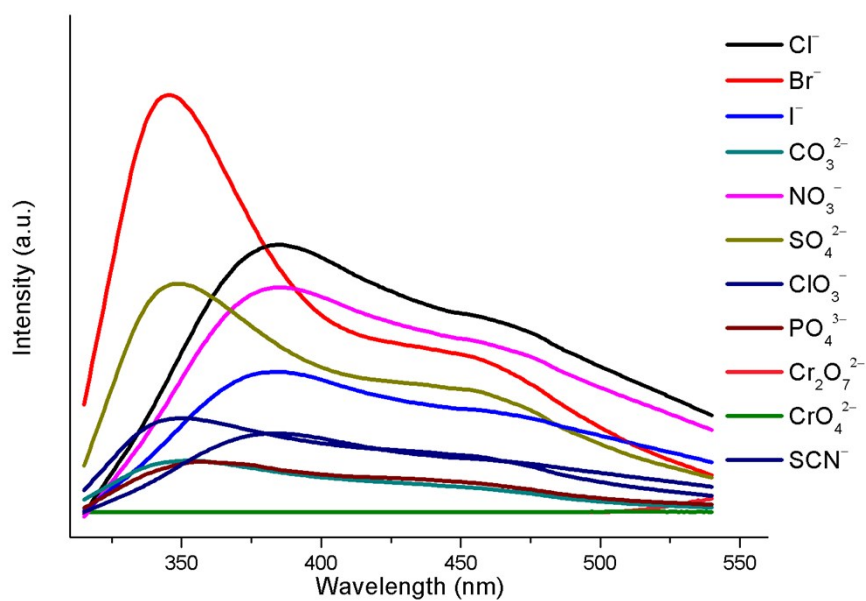

Figure S16. The luminescence emission spectras of complex **1-DMA** suspensions with different anions.

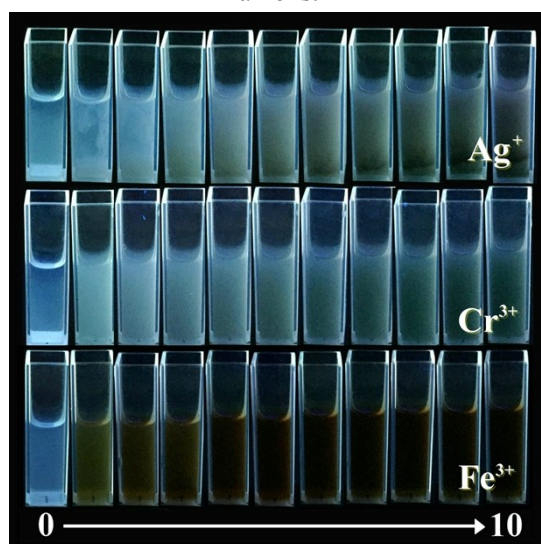

Figure S17. The luminescence intensities of **1-DMA** suspensions with cations concentrations varying from 0 to 1429 ppm.

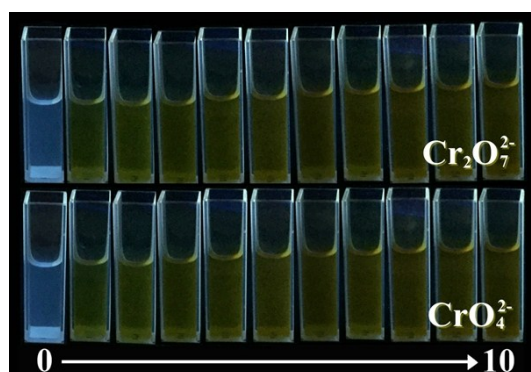

Figure S18. The luminescence intensities of **1-DMA** suspensions with anions concentrations varying from 0 to 1429 ppm.

## (5) MOLECULAR FORMULA OF DYES

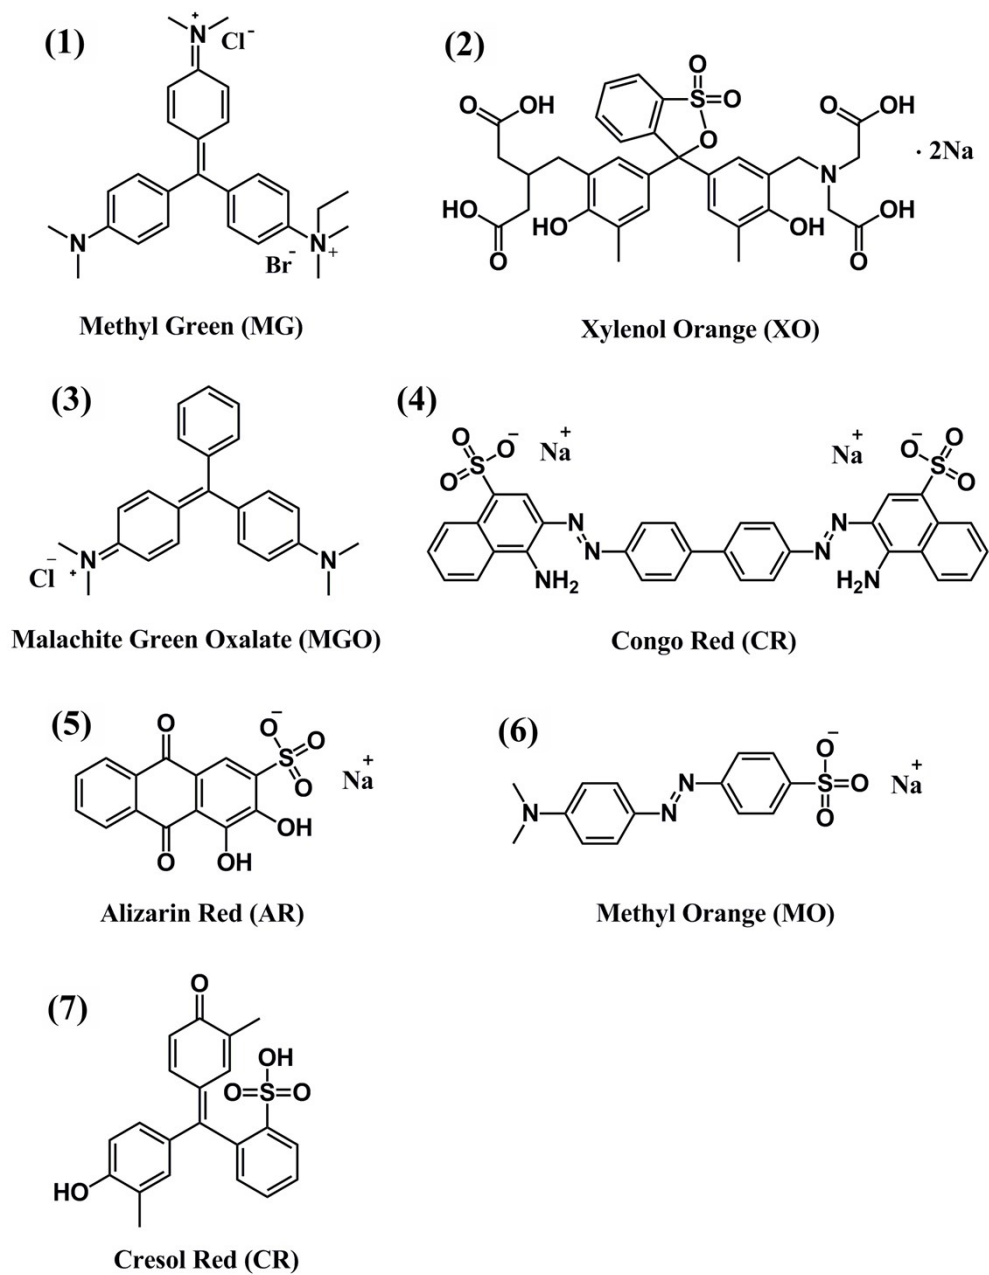

Figure S19. The structures of seven kinds of dyes.

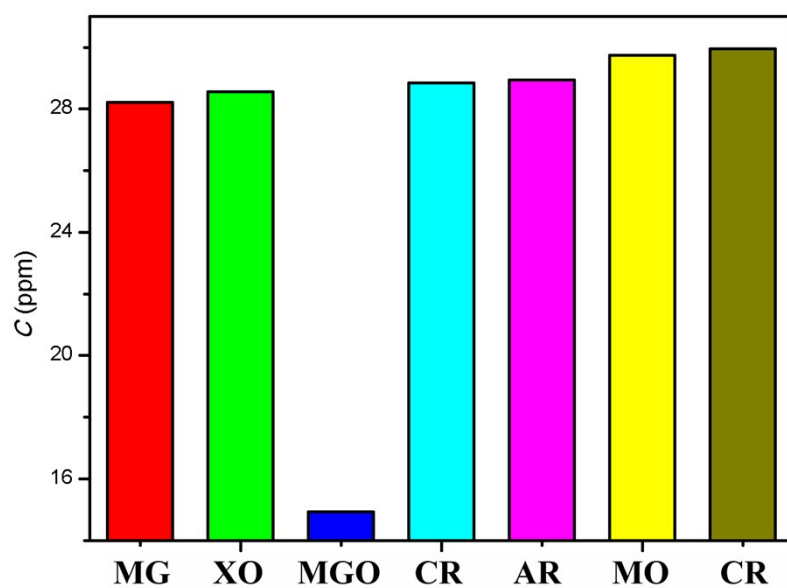

Figure S20. The concentrations of dyes in 2 hours after the additions of complexes 1-DMA.

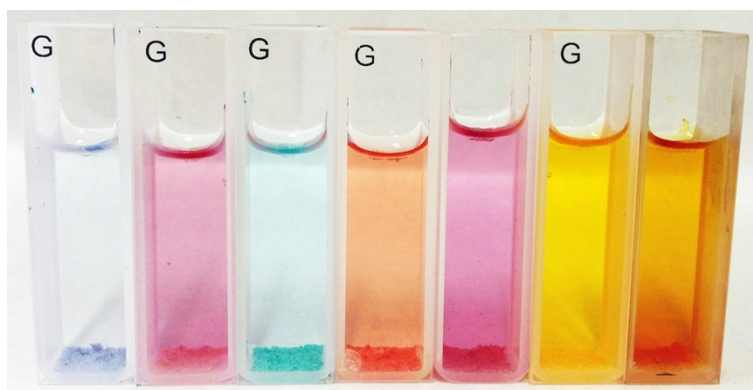

Figure S21. The naked-eye photos of dyes in 2 hours after the additions of complexes 1-DMA.

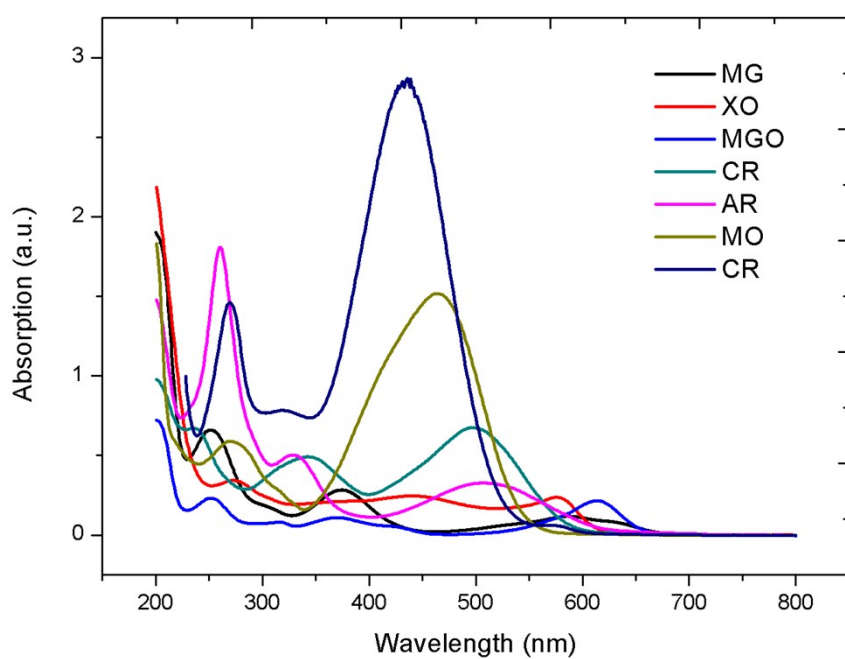

Figure S22. the UV spectra of seven different kinds of dye.

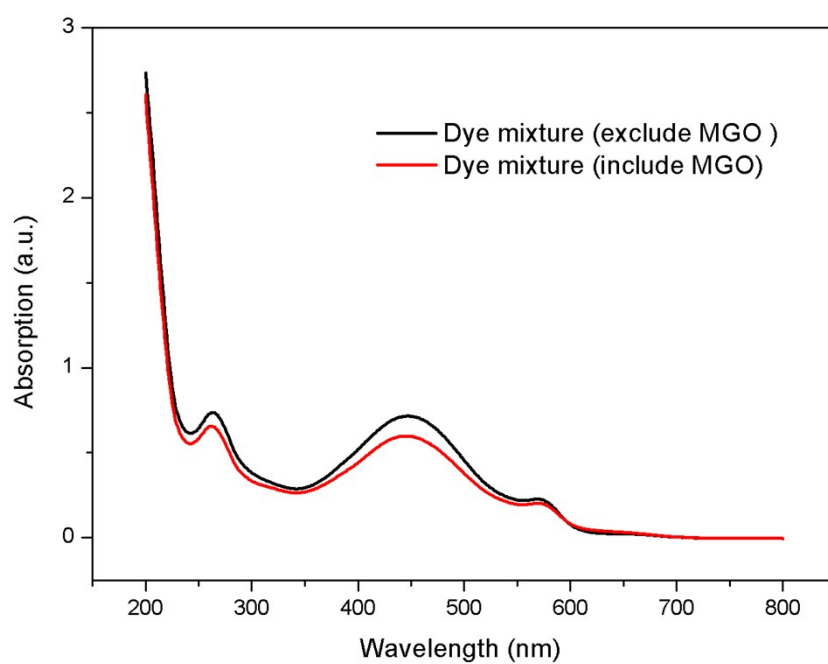

Figure S23. The UV spectrum of six dyes mixture (exclude MGO) and seven dyes mixture (include MGO)

## (6) CRYSTALLOGRAPHIC DATAS TABLES

**Table S1.** Crystallographic data and details of diffraction experiments for complexes **1**.

| Complex <b>1</b> |                 |                              |                 |
|------------------|-----------------|------------------------------|-----------------|
| Formula          | C42 H26 O20 Zn5 | $V$ (Å <sup>3</sup> )        | 1217.3          |
| $M_r$            | 1177.48         | $Z$                          | 1               |
| Crystal system   | triclinic       | $\rho$ (g cm <sup>-3</sup> ) | 1.606           |
| Space group      | $P\bar{1}$      | $\mu$ (mm <sup>-1</sup> )    | 2.501           |
| $a$ (Å)          | 6.327           | $T$ (K)                      | 296(2)          |
| $b$ (Å)          | 12.671          | Goof                         | 1.001           |
| $c$ (Å)          | 15.684          | $R$ [ $I > 2\sigma(I)$ ]     | $R_1 = 0.0432$  |
| $\alpha$ (°)     | 95.69           |                              | $wR_2 = 0.1390$ |
| $\beta$ (°)      | 99.77           | $R$ (all data)               | $R_1 = 0.0530$  |
| $\gamma$ (°)     | 98.01           |                              | $wR_2 = 0.1454$ |

**Table S2.** Selected Bond Lengths (Å) and Angles (deg) for **1**.

| Complex <b>1</b>     |            |                      |            |
|----------------------|------------|----------------------|------------|
| Zn(1)-O(2W)          | 2.007(3)   | Zn(1)-O(8)#4         | 2.102(4)   |
| Zn(1)-O(1)           | 2.064(4)   | Zn(1)-O(4)#2         | 2.130(3)   |
| Zn(1)-O(1W)          | 2.012(3)   | Zn(1)-O(4)#7         | 2.435(3)   |
| Zn(2)-O(2)           | 1.924(4)   | Zn(2)-O(1W)          | 1.981(3)   |
| Zn(2)-O(7)#5         | 1.924(4)   | Zn(2)-O(2W)#8        | 1.978(3)   |
| Zn(3)-O(1W)          | 2.080(3)   | Zn(3)-O(2W)#8        | 2.200(3)   |
| Zn(3)-O(5)#2         | 2.063(3)   |                      |            |
| O(1W)-Zn(1)-O(4)#7   | 78.40(12)  | O(4)#2-Zn(1)-O(4)#7  | 81.89(13)  |
| O(1W)-Zn(1)-O(8)#4   | 85.14(14)  | O(2W)-Zn(1)-O(4)#2   | 86.85(13)  |
| O(8)#4-Zn(1)-O(4)#7  | 88.69(14)  | O(2W)-Zn(1)-O(4)#7   | 90.32(12)  |
| O(2W)-Zn(1)-O(8)#4   | 92.13(14)  | O(1)-Zn(1)-O(8)#4    | 92.97(16)  |
| O(1W)-Zn(1)-O(4)#2   | 93.99(13)  | O(1W)-Zn(1)-O(1)     | 94.72(14)  |
| O(2W)-Zn(1)-O(1)     | 96.64(15)  | O(1)-Zn(1)-O(4)#2    | 96.51(14)  |
| O(2W)-Zn(1)-O(1W)    | 168.44(14) | O(8)#4-Zn(1)-O(4)#2  | 170.51(15) |
| O(1)-Zn(1)-O(4)#7    | 172.77(12) | O(2W)#8-Zn(2)-O(1W)  | 91.45(13)  |
| O(2)-Zn(2)-O(7)#5    | 113.48(17) | O(2)-Zn(2)-O(2W)#8   | 118.09(17) |
| O(7)#5-Zn(2)-O(2W)#8 | 111.92(14) | O(2)-Zn(2)-O(1W)     | 109.20(15) |
| O(7)#5-Zn(2)-O(1W)   | 110.39(15) | O(5)#9-Zn(3)-O(1W)   | 84.85(13)  |
| O(1W)-Zn(3)-O(2W)#8  | 82.89(12)  | O(5)#9-Zn(3)-O(2W)#8 | 93.94(13)  |
| O(5)#2-Zn(3)-O(2W)#8 | 86.06(13)  | O(5)#2-Zn(3)-O(1W)   | 95.15(13)  |
| O(1W)-Zn(3)-O(2W)#11 | 97.11(12)  | O(1W)#10-Zn(3)-O(1W) | 180.0      |
| O(5)#9-Zn(3)-O(5)#2  | 180.00(19) |                      |            |

Symmetry transformations used to generate equivalent atoms: #1  $x-1, y+1, z$ ; #2  $-x+2, -y+1, -z+1$ ; #3  $x, y+1, z$ ; #4  $-x+2, -y, -z$ ; #5  $-x+3, -y, -z$ ; #6  $x-1, y, z$ ; #7  $x, y-1, z$ ; #8  $x+1, y, z$ ; #9  $x+1, y-1, z$ ; #10  $-x+3, -y, -z+1$ ; #11  $-x+2, -y, -z+1$ .

## REFERENCES

- [1] Sheldrick G M. *SHELXL-97, Program for Crystal Structure Determination*, University of Göttingen, Germany, 1997.
- [2] Sheldrick G M. *SHELXL-97, Program for Crystal Structure Refinement*, University of Göttingen, Germany, 1997.
